# Supplementary material
Source: publisher figshare collection journal article supplement (https://acs.figshare.com/ndownloader/files/10597543)
Supplement: Supplementary file 1 [file 10597543]

## Sheet: Con-VS-IJ
Level	mean(Con)	variance(Con)	standard error(Con)	mean(IJ)	variance(IJ)	standard error(IJ)	p.value	foldchange	log2 foldchange
EC:5.4.99.9	8.61636e-06	5.64298e-11	4.33704e-06	3.18956e-05	1.69709e-10	5.31834e-06	0.038961	3.70175	1.88821
EC:1.3.3.4	4.08032e-05	1.3815e-10	6.78602e-06	0.000139502	2.87892e-09	2.19048e-05	0.027972	3.4189	1.77353
EC:1.17.4.2	4.38478e-05	1.14271e-09	1.95168e-05	0.000105322	9.56625e-10	1.26269e-05	0.040959	2.40199	1.26423
EC:3.1.2.23	0.000114521	3.95398e-10	1.14804e-05	0.000232995	3.25273e-09	2.32835e-05	0.027972	2.03452	1.02469
EC:4.2.1.18	0.000167168	5.57663e-09	4.31147e-05	0.000325616	8.44357e-09	3.75135e-05	0.048951	1.94784	0.961872
EC:3.1.6.6	8.05589e-05	1.87175e-10	7.89884e-06	0.000149223	2.65202e-09	2.10239e-05	0.036963	1.85234	0.88935
EC:2.4.2.21	7.34256e-05	1.15901e-09	1.96554e-05	0.000126573	3.60249e-10	7.74865e-06	0.034965	1.72383	0.785614
EC:2.7.8.28	6.3378e-05	2.39525e-09	2.82563e-05	0.000103339	1.28946e-10	4.63584e-06	0.031968	1.63052	0.705336
EC:5.5.1.4	0.000116672	7.73797e-10	1.60603e-05	0.000189217	1.13146e-09	1.37323e-05	0.032967	1.62179	0.697586
EC:2.7.7.33	0.000103092	7.72432e-10	1.60461e-05	0.000158865	4.64053e-10	8.79444e-06	0.034965	1.541	0.623871
EC:2.7.11.17	0.000111522	2.54144e-10	9.20406e-06	0.000170495	1.34948e-09	1.49971e-05	0.041958	1.52881	0.61241
EC:5.3.3.18	0.000408929	5.82412e-09	4.4061e-05	0.000594611	1.07682e-08	4.23639e-05	0.042957	1.45407	0.540096
EC:2.4.2.28	0.000372663	4.80768e-09	4.0032e-05	0.00053671	6.82617e-09	3.37297e-05	0.038961	1.4402	0.526272
EC:2.2.1.7	0.000700907	1.10809e-08	6.07753e-05	0.000965499	1.71391e-08	5.34464e-05	0.034965	1.3775	0.462052
EC:3.4.13.19	0.000236998	1.62902e-10	7.3689e-06	0.000311045	2.19199e-09	1.91137e-05	0.043956	1.31244	0.392246
EC:2.3.1.12	0.000600684	3.54001e-09	3.43512e-05	0.00076305	9.48389e-09	3.97574e-05	0.035964	1.2703	0.345172
EC:3.2.1.141	0.000288156	2.22154e-09	2.72124e-05	0.000357423	9.10279e-10	1.23172e-05	0.026973	1.24038	0.310783
EC:1.8.1.9	0.000862271	2.49122e-08	9.11266e-05	0.00105345	7.53709e-09	3.54426e-05	0.025974	1.22172	0.288912
EC:1.1.1.1	0.00101815	9.7283e-10	1.80077e-05	0.00121689	1.67068e-08	5.2768e-05	0.042957	1.1952	0.257248
EC:1.3.99.3	0.00163035	5.49467e-08	0.000135335	0.00192385	2.34782e-08	6.25542e-05	0.027972	1.18002	0.238814
EC:2.7.7.8	0.00135326	2.95933e-09	3.14077e-05	0.00116035	7.76298e-09	3.59698e-05	0.027972	0.85745	-0.221876
EC:2.6.1.1	0.000910421	6.59733e-09	4.68947e-05	0.000779804	4.56104e-09	2.75712e-05	0.043956	0.856531	-0.223422
EC:2.3.1.9	0.00262492	3.14981e-08	0.000102466	0.00218484	1.84432e-08	5.54424e-05	0.018981	0.832348	-0.264742
EC:5.3.1.16	0.000491433	1.52899e-09	2.25758e-05	0.000400517	2.1851e-09	1.90836e-05	0.018981	0.814998	-0.295132
EC:6.1.1.10	0.00134454	1.44454e-08	6.93912e-05	0.00108347	1.93661e-08	5.68127e-05	0.018981	0.80583	-0.311452
EC:3.4.11.5	0.000956707	1.21498e-08	6.36391e-05	0.000765187	1.04973e-08	4.18277e-05	0.034965	0.799813	-0.322265
EC:4.1.3.1	0.000435898	3.71944e-10	1.11347e-05	0.000334665	8.40863e-10	1.18382e-05	0.018981	0.767761	-0.381271
EC:2.5.1.6	0.00082363	2.33309e-08	8.8187e-05	0.000620018	8.6972e-09	3.80727e-05	0.031968	0.752788	-0.409684
EC:5.3.1.1	0.000447072	3.62991e-09	3.47846e-05	0.00032793	2.42139e-09	2.00889e-05	0.018981	0.733505	-0.44712
EC:2.1.1.190	0.000482367	5.12292e-09	4.13236e-05	0.000331519	2.51008e-09	2.04535e-05	0.018981	0.687276	-0.541038
EC:2.3.1.41	0.000902025	6.75793e-09	4.7462e-05	0.000603243	2.256e-08	6.13188e-05	0.038961	0.668765	-0.580429
EC:2.3.1.37	0.000223218	7.532e-10	1.58451e-05	0.00014517	1.40773e-09	1.53174e-05	0.038961	0.65035	-0.620713
EC:1.3.1.9	0.000549179	1.17847e-08	6.26757e-05	0.000345983	3.19709e-09	2.30835e-05	0.018981	0.630002	-0.666573
EC:3.5.1.68	0.000514239	1.58869e-08	7.27711e-05	0.000320673	7.03859e-09	3.42505e-05	0.038961	0.623588	-0.681334
EC:2.6.99.2	0.000533708	2.444e-09	2.85424e-05	0.00032958	1.20798e-08	4.48698e-05	0.032967	0.617528	-0.695424
EC:3.7.1.3	0.000315899	7.51917e-10	1.58316e-05	0.000194688	3.89814e-09	2.5489e-05	0.046953	0.616298	-0.6983
EC:1.3.5.2	0.000109334	2.43529e-10	9.0098e-06	5.77589e-05	1.12806e-09	1.37117e-05	0.04995	0.528281	-0.920623
EC:2.7.1.37	0.000187897	1.73049e-09	2.40173e-05	9.51488e-05	8.91913e-10	1.21923e-05	0.018981	0.506388	-0.981684
EC:1.1.1.154	0.000218323	6.32017e-10	1.45146e-05	0.000109284	8.28175e-10	1.17486e-05	0.018981	0.500559	-0.998387
EC:2.4.1.57	0.000126033	1.59114e-09	2.303e-05	6.25344e-05	1.13827e-09	1.37736e-05	0.040959	0.496175	-1.01108
EC:5.1.1.17	0.000203449	1.10009e-08	6.05555e-05	9.49299e-05	2.88863e-10	6.93858e-06	0.018981	0.466603	-1.09973
EC:3.1.1.22	0.000352818	9.89827e-09	5.74406e-05	0.000163029	7.29868e-09	3.48776e-05	0.018981	0.462078	-1.11379
EC:3.6.3.16	0.000127367	9.88031e-10	1.81478e-05	5.7792e-05	4.21532e-10	8.38185e-06	0.018981	0.453744	-1.14005
EC:5.3.3.8	0.000162621	1.2344e-09	2.02846e-05	7.34291e-05	1.43733e-09	1.54776e-05	0.047952	0.451534	-1.14709
EC:3.2.1.170	4.68475e-05	8.10369e-11	5.19734e-06	1.86039e-05	1.59013e-10	5.14803e-06	0.030969	0.397116	-1.33237
EC:1.16.3.1	8.65379e-05	2.47571e-09	2.87269e-05	3.24998e-05	5.57529e-10	9.63958e-06	0.045954	0.375555	-1.4129
EC:4.2.1.19 3.1.3.15	0.000144709	4.34213e-09	3.80444e-05	5.43254e-05	1.14791e-09	1.38318e-05	0.026973	0.375411	-1.41346
EC:1.3.1.54	0.000104915	2.48259e-09	2.87668e-05	2.99416e-05	1.07403e-09	1.33793e-05	0.031968	0.28539	-1.80899
EC:2.3.3.10	2.71891e-05	2.45677e-10	9.04945e-06	7.45113e-06	3.38683e-11	2.37586e-06	0.018981	0.274048	-1.8675
EC:4.2.1.12	0.000215367	9.73112e-09	5.69536e-05	5.721e-05	6.67083e-10	1.05442e-05	0.018981	0.26564	-1.91246
EC:4.1.3.38	7.71979e-05	6.65776e-10	1.48972e-05	1.87189e-05	1.71169e-10	5.34118e-06	0.018981	0.242479	-2.04407
EC:1.10.9.1	7.38427e-05	1.71506e-09	2.391e-05	1.48431e-05	2.79173e-10	6.82121e-06	0.018981	0.20101	-2.31466
EC:1.5.8.2	4.1019e-05	1.61782e-10	7.34353e-06	8.19183e-06	5.09809e-11	2.91493e-06	0.018981	0.199708	-2.32404
EC:2.4.1.32	2.33945e-05	8.12936e-11	5.20556e-06	4.38819e-06	4.62488e-11	2.77635e-06	0.026973	0.187574	-2.41447

## Sheet: Con-VS-BW
Level	mean(Con)	variance(Con)	standard error(Con)	mean(BW)	variance(BW)	standard error(BW)	p.value	foldchange	log2 foldchange
EC:4.1.3.39	0	0	0	8.32005e-05	1.27043e-09	1.45512e-05
EC:2.4.1.187	0	0	0	0.000103766	1.96097e-09	1.80784e-05
EC:6.2.1.9	0	0	0	7.44906e-05	1.92329e-09	1.79039e-05
EC:1.14.13.8	0	0	0	7.91532e-05	1.73728e-09	1.70161e-05
EC:4.1.1.77	0	0	0	0.000101279	3.93029e-09	2.55939e-05
EC:5.3.1.5	3.12316e-06	2.92624e-11	3.12316e-06	0.000103378	1.71846e-09	1.69237e-05	0.018981	33.1004	5.04878
EC:2.6.1.85 4.1.3.38	4.41385e-06	5.84463e-11	4.41385e-06	7.95651e-05	1.86843e-09	1.76467e-05	0.042957	18.0262	4.17203
EC:1.1.1.11	6.36215e-06	1.21431e-10	6.36215e-06	0.000106927	3.2966e-09	2.344e-05	0.036963	16.8067	4.07097
EC:1.14.11.2	1.00617e-05	9.19399e-11	5.53594e-06	0.000164199	2.66826e-09	2.10881e-05	0.018981	16.3192	4.0285
EC:1.2.1.60	4.97764e-06	7.43307e-11	4.97764e-06	7.93964e-05	1.86045e-09	1.76089e-05	0.040959	15.9506	3.99554
EC:2.1.1.207	6.26966e-06	1.17926e-10	6.26966e-06	8.46716e-05	2.54031e-09	2.05763e-05	0.038961	13.505	3.75542
EC:3.1.4.3	3.87944e-06	4.51502e-11	3.87944e-06	3.24929e-05	2.33303e-10	6.23569e-06	0.024975	8.37566	3.0662
EC:3.2.1.51	1.89808e-05	2.75739e-10	9.58712e-06	0.000154496	5.88833e-09	3.13271e-05	0.038961	8.13958	3.02496
EC:3.2.1.17	2.60523e-05	6.04525e-10	1.41954e-05	0.000177067	6.98278e-09	3.41145e-05	0.045954	6.7966	2.76481
EC:1.7.1.1	9.72039e-06	2.83458e-10	9.72039e-06	6.58252e-05	3.05548e-10	7.13616e-06	0.018981	6.77187	2.75955
EC:5.1.1.3	2.27404e-05	7.21233e-10	1.55052e-05	0.000143234	2.34478e-09	1.97686e-05	0.018981	6.29866	2.65505
EC:4.1.1.39	5.09359e-05	2.85775e-10	9.76004e-06	0.00030597	1.54341e-08	5.07184e-05	0.018981	6.00696	2.58664
EC:3.7.1.2	1.52418e-05	2.27843e-10	8.7148e-06	9.02133e-05	5.91975e-10	9.9329e-06	0.018981	5.9188	2.5653
EC:4.2.1.40	1.62406e-05	2.19796e-10	8.55953e-06	9.47043e-05	1.77768e-09	1.72128e-05	0.037962	5.83134	2.54383
EC:4.1.2.14 4.1.3.16	2.19009e-05	3.96891e-10	1.1502e-05	0.000123113	1.56738e-09	1.61626e-05	0.018981	5.62135	2.49092
EC:1.14.13.7	3.75309e-05	5.69758e-10	1.37811e-05	0.000205825	4.70509e-09	2.80032e-05	0.028971	5.48414	2.45527
EC:3.4.11.4	9.42127e-06	6.66131e-11	4.71215e-06	4.86484e-05	4.47723e-10	8.63831e-06	0.033966	5.16367	2.3684
EC:3.2.1.4	4.45031e-05	1.19659e-10	6.31555e-06	0.000221557	7.93638e-09	3.63694e-05	0.024975	4.97847	2.3157
EC:1.1.1.215	2.66496e-05	1.53053e-10	7.14266e-06	0.000132155	2.738e-09	2.13619e-05	0.032967	4.95898	2.31004
EC:3.4.24.71	1.40046e-05	3.24592e-10	1.04018e-05	6.68905e-05	9.78392e-10	1.27697e-05	0.046953	4.77633	2.2559
EC:3.2.1.45	1.12628e-05	1.24409e-10	6.43969e-06	5.16666e-05	4.89308e-10	9.03057e-06	0.045954	4.58738	2.19767
EC:1.12.99.6	5.76609e-05	1.98115e-09	2.56979e-05	0.000259455	1.01285e-08	4.10862e-05	0.040959	4.49967	2.16982
EC:3.2.1.55	5.93198e-05	1.29876e-10	6.57968e-06	0.00026328	2.00871e-09	1.82971e-05	0.018981	4.43832	2.15001
EC:1.2.1.32	2.07957e-05	3.24556e-10	1.04012e-05	8.69189e-05	1.10045e-09	1.35428e-05	0.034965	4.17965	2.06338
EC:3.2.1.23	7.66272e-05	2.89072e-10	9.81617e-06	0.000315238	1.19886e-08	4.47002e-05	0.018981	4.11392	2.04051
EC:1.7.2.4	8.22715e-05	6.94487e-10	1.5215e-05	0.000302028	9.70419e-09	4.02165e-05	0.02997	3.67111	1.87622
EC:4.1.1.15	1.22991e-05	1.53402e-10	7.15081e-06	4.49324e-05	1.99363e-10	5.7643e-06	0.032967	3.65332	1.86921
EC:2.7.7.49	0.000498185	1.14547e-09	1.95403e-05	0.00174665	3.21683e-07	0.000231547	0.030969	3.50602	1.80983
EC:3.5.1.44	3.93519e-05	1.68016e-09	2.36655e-05	0.000134243	7.36536e-10	1.10795e-05	0.018981	3.41134	1.77034
EC:3.1.4.16	2.59243e-05	5.17987e-10	1.31401e-05	8.81015e-05	1.02703e-09	1.30833e-05	0.040959	3.39841	1.76486
EC:4.2.1.3 4.2.1.99	7.15283e-05	3.509e-09	3.42004e-05	0.000234475	1.90877e-09	1.78362e-05	0.018981	3.27807	1.71285
EC:4.1.1.47	2.94189e-05	7.27212e-10	1.55693e-05	9.28581e-05	1.27334e-09	1.45679e-05	0.03996	3.15641	1.65829
EC:1.3.99.26 1.3.99.28 1.3.99.29 1.3.99.31	1.98944e-05	4.48549e-11	3.86674e-06	6.24653e-05	6.93912e-10	1.07542e-05	0.042957	3.13985	1.6507
EC:1.7.2.5	0.000177744	1.59952e-09	2.30905e-05	0.000550413	3.37845e-08	7.50383e-05	0.048951	3.09666	1.63072
EC:2.7.11.5	0.000110863	5.31071e-09	4.20742e-05	0.000341664	1.15621e-08	4.38978e-05	0.024975	3.08185	1.6238
EC:2.4.2.21	7.34256e-05	1.15901e-09	1.96554e-05	0.000225563	4.1789e-09	2.6391e-05	0.018981	3.07199	1.61917
EC:4.2.1.44	3.0361e-05	5.22597e-10	1.31984e-05	8.71589e-05	9.03782e-10	1.22732e-05	0.040959	2.87075	1.52143
EC:3.1.1.61	5.46217e-05	2.24047e-09	2.7328e-05	0.000154841	3.59641e-09	2.44827e-05	0.036963	2.8348	1.50325
EC:1.4.3.16	0.000150652	5.89578e-10	1.40188e-05	0.00042264	3.51399e-09	2.42005e-05	0.018981	2.8054	1.48821
EC:2.6.1.66 2.6.1.2	0.000131451	5.96616e-09	4.45951e-05	0.000363786	6.4549e-09	3.27996e-05	0.018981	2.76747	1.46857
EC:3.1.4.54	7.0619e-05	1.16141e-09	1.96758e-05	0.000182483	4.12824e-09	2.62305e-05	0.03996	2.58405	1.36963
EC:3.1.4.4	0.000105279	1.00357e-09	1.829e-05	0.000269593	1.1948e-09	1.41114e-05	0.018981	2.56074	1.35656
EC:1.1.99.28	8.66758e-05	1.14859e-09	1.95669e-05	0.000206059	5.76655e-09	3.10015e-05	0.045954	2.37736	1.24936
EC:1.3.3.4	4.08032e-05	1.3815e-10	6.78602e-06	9.5198e-05	8.60723e-10	1.19772e-05	0.032967	2.3331	1.22225
EC:3.5.1.32	0.000168217	6.40855e-10	1.46157e-05	0.000382118	5.87905e-09	3.13024e-05	0.018981	2.27158	1.1837
EC:1.8.2.1	0.000143738	2.86118e-09	3.08824e-05	0.000319214	7.12515e-09	3.44605e-05	0.043956	2.22081	1.15108
EC:3.2.2.4	0.000118182	2.16123e-09	2.68404e-05	0.000259488	6.02398e-09	3.16859e-05	0.032967	2.19566	1.13466
EC:4.1.99.3	0.000266369	2.45835e-09	2.86261e-05	0.000570441	3.37325e-08	7.49806e-05	0.048951	2.14154	1.09865
EC:1.4.1.4	0.000109425	1.54486e-09	2.26926e-05	0.000230194	2.18695e-09	1.90917e-05	0.02997	2.10366	1.0729
EC:2.1.1.107	0.000189334	8.14357e-10	1.64758e-05	0.000365231	1.17499e-08	4.42529e-05	0.03996	1.92903	0.947873
EC:1.1.2.8	0.000299608	4.62393e-10	1.24149e-05	0.00057781	2.0031e-08	5.77798e-05	0.024975	1.92855	0.947517
EC:1.10.3.3	0.000353542	1.21759e-10	6.37074e-06	0.000678851	2.70755e-08	6.71757e-05	0.036963	1.92014	0.941213
EC:5.4.2.2	0.00013136	5.66944e-10	1.37471e-05	0.000243435	1.68014e-09	1.67339e-05	0.018981	1.85319	0.890014
EC:2.8.3.5	0.000183436	3.71095e-09	3.51708e-05	0.000338925	7.51725e-09	3.5396e-05	0.045954	1.84765	0.885693
EC:1.1.1.35	0.000560667	1.31145e-08	6.61173e-05	0.00103356	4.44781e-08	8.60989e-05	0.027972	1.84344	0.8824
EC:1.6.1.1	4.99764e-05	2.39803e-10	8.9406e-06	8.66939e-05	3.41767e-10	7.54726e-06	0.041958	1.7347	0.794684
EC:1.1.1.93 4.1.1.73 1.1.1.83	0.000183801	2.04844e-09	2.61307e-05	0.00031063	5.42527e-09	3.00701e-05	0.048951	1.69003	0.757051
EC:2.1.1.197	0.000174052	3.28961e-09	3.3114e-05	0.000292042	3.31477e-09	2.35045e-05	0.028971	1.67791	0.746663
EC:2.1.1.226 2.1.1.227	0.000104187	4.44395e-11	3.84879e-06	0.000174092	1.25004e-09	1.4434e-05	0.030969	1.67096	0.740676
EC:2.7.13.1	0.000376199	3.55903e-09	3.44433e-05	0.000607916	1.39057e-08	4.81416e-05	0.032967	1.61594	0.692375
EC:3.2.1.21	0.000313463	3.49263e-09	3.41205e-05	0.000505986	8.86788e-09	3.84445e-05	0.027972	1.61418	0.690801
EC:2.3.1.129	0.000205835	5.26943e-10	1.32532e-05	0.000331762	5.49471e-09	3.0262e-05	0.032967	1.61178	0.688659
EC:2.7.7.24	0.00016349	1.01894e-10	5.82791e-06	0.000254097	2.75786e-09	2.14393e-05	0.033966	1.5542	0.636176
EC:2.1.1.222 2.1.1.64	0.000478663	5.43848e-09	4.25773e-05	0.000725287	1.99011e-08	5.75921e-05	0.048951	1.51523	0.599541
EC:3.4.24.40	0.000179851	4.44838e-09	3.85071e-05	0.000272131	1.98856e-09	1.82051e-05	0.030969	1.51309	0.597498
EC:1.5.5.1	0.000315007	9.96928e-09	5.76463e-05	0.000460004	4.13008e-09	2.62364e-05	0.041958	1.4603	0.54626
EC:3.6.3.14	0.00234911	9.60355e-08	0.000178919	0.00339285	1.74462e-07	0.00017052	0.018981	1.44431	0.530382
EC:6.1.1.3	0.000639634	3.52789e-09	3.42923e-05	0.000885256	1.33955e-08	4.72503e-05	0.034965	1.38401	0.468849
EC:6.3.1.2	0.00123656	1.29319e-08	6.56554e-05	0.00171087	1.31786e-07	0.000148204	0.043956	1.38357	0.468395
EC:1.4.4.2	0.000561976	1.85236e-08	7.85783e-05	0.00076579	1.11025e-08	4.30165e-05	0.04995	1.36267	0.44644
EC:3.1.13.5	0.000191097	1.94186e-09	2.54418e-05	0.000253494	1.12276e-09	1.36794e-05	0.046953	1.32652	0.407646
EC:3.1.3.5	0.000699869	3.27666e-09	3.30488e-05	0.000893877	7.24656e-10	1.09898e-05	0.018981	1.27721	0.352991
EC:2.7.7.4	0.000557605	2.12443e-09	2.6611e-05	0.000685971	4.89041e-09	2.85494e-05	0.043956	1.23021	0.298905
EC:6.1.1.20	0.00135694	1.78206e-09	2.43726e-05	0.00163715	2.715e-08	6.72682e-05	0.046953	1.2065	0.27083
EC:2.7.13.3	0.0109797	1.21136e-07	0.000200944	0.0131827	7.54372e-07	0.000354582	0.018981	1.20065	0.263813
EC:5.4.99.2	0.00132365	1.51761e-08	7.11245e-05	0.00156411	1.99213e-08	5.76214e-05	0.045954	1.18166	0.240813
EC:3.6.4.12	0.00459443	7.74364e-09	5.08056e-05	0.00492685	1.23311e-08	4.53342e-05	0.018981	1.07235	0.10078
EC:6.3.5.5	0.0022975	2.93406e-08	9.8895e-05	0.00194938	4.62644e-08	8.78108e-05	0.031968	0.848478	-0.237052
EC:3.1.6.1	0.00105899	7.86424e-09	5.11998e-05	0.000885473	2.21612e-09	1.92186e-05	0.018981	0.836147	-0.258172
EC:2.5.1.18	0.00306427	4.53022e-08	0.000122885	0.0025328	5.9513e-08	9.95933e-05	0.034965	0.826558	-0.274812
EC:4.2.1.33 4.2.1.35	0.00167663	2.6291e-08	9.36144e-05	0.00134326	2.08514e-08	5.89511e-05	0.043956	0.801166	-0.319827
EC:2.2.1.6	0.00377577	2.0551e-07	0.000261731	0.00301655	1.17656e-07	0.000140033	0.035964	0.798924	-0.32387
EC:2.3.1.9	0.00262492	3.14981e-08	0.000102466	0.00206801	1.46008e-08	4.93302e-05	0.018981	0.787839	-0.344027
EC:2.6.1.1	0.000910421	6.59733e-09	4.68947e-05	0.000716963	6.91606e-09	3.39511e-05	0.018981	0.787506	-0.344636
EC:1.1.5.3	0.000893666	2.70241e-08	9.49107e-05	0.000695366	1.13747e-08	4.35405e-05	0.047952	0.778105	-0.361964
EC:1.1.1.100	0.00352098	1.31694e-08	6.62555e-05	0.00270984	1.57859e-07	0.000162203	0.031968	0.769624	-0.377773
EC:2.1.1.14	0.00278748	3.34503e-08	0.000105594	0.00211731	1.04306e-07	0.00013185	0.027972	0.75958	-0.396726
EC:2.7.8.13	0.000970055	7.13022e-09	4.87518e-05	0.000735485	9.01915e-09	3.8771e-05	0.018981	0.758189	-0.399371
EC:3.1.1.17	0.000777549	7.69362e-09	5.06413e-05	0.000586765	3.10113e-09	2.27345e-05	0.018981	0.754635	-0.40615
EC:2.4.1.129	0.00186769	7.5677e-08	0.000158826	0.00140159	2.4727e-08	6.41963e-05	0.031968	0.750442	-0.414188
EC:4.6.1.1	0.00908612	2.30087e-07	0.00027694	0.00681708	1.08918e-07	0.000134733	0.018981	0.750274	-0.414511
EC:6.4.1.2 6.3.4.14	0.0011929	1.92377e-09	2.5323e-05	0.00089158	1.58881e-08	5.14589e-05	0.018981	0.747406	-0.420035
EC:1.1.1.85	0.000768645	6.37272e-09	4.60895e-05	0.000573026	6.89368e-09	3.38961e-05	0.027972	0.745501	-0.423717
EC:4.1.2.17	0.000747972	7.47477e-09	4.99158e-05	0.000550869	1.29294e-08	4.64209e-05	0.043956	0.736484	-0.441273
EC:4.2.1.6	0.00094156	2.68564e-08	9.46157e-05	0.000680854	1.88836e-08	5.61006e-05	0.024975	0.723112	-0.467708
EC:1.1.1.26	0.000657079	2.02502e-09	2.59809e-05	0.000473663	8.59101e-09	3.78396e-05	0.034965	0.720861	-0.472207
EC:3.4.14.5	0.000353346	1.93416e-09	2.53914e-05	0.000254492	3.43659e-09	2.39325e-05	0.018981	0.720235	-0.473461
EC:5.5.1.1	0.000534447	7.38599e-09	4.96185e-05	0.000384162	5.43263e-09	3.00905e-05	0.038961	0.718803	-0.476331
EC:2.8.3.16	0.00375944	1.31151e-08	6.61188e-05	0.00269651	3.16292e-07	0.000229598	0.024975	0.717262	-0.479427
EC:3.5.4.31 3.5.4.28	0.000496363	1.84849e-08	7.84961e-05	0.000352556	1.67064e-09	1.66865e-05	0.03996	0.71028	-0.493541
EC:1.1.3.6	0.000300388	3.01784e-09	3.17167e-05	0.000213105	1.12143e-09	1.36713e-05	0.018981	0.709432	-0.495263
EC:1.2.7.1	0.000818076	1.16702e-08	6.23704e-05	0.000579348	6.63114e-09	3.32444e-05	0.018981	0.708183	-0.497806
EC:1.2.7.3	0.00201495	1.69311e-08	7.51246e-05	0.00142199	8.19867e-08	0.000116895	0.031968	0.705718	-0.502836
EC:2.7.8.23	0.000460755	7.17136e-09	4.88923e-05	0.000324452	3.99304e-09	2.57974e-05	0.024975	0.704174	-0.505996
EC:2.8.1.7 4.4.1.16	0.000727554	5.30123e-09	4.20366e-05	0.000511177	4.2319e-09	2.65578e-05	0.018981	0.702597	-0.509231
EC:3.7.1.3	0.000315899	7.51917e-10	1.58316e-05	0.000219966	1.46677e-09	1.56353e-05	0.018981	0.696316	-0.522187
EC:1.1.99.21	0.000199346	7.30856e-10	1.56083e-05	0.000138722	4.4559e-10	8.61771e-06	0.027972	0.695884	-0.523082
EC:6.1.1.10	0.00134454	1.44454e-08	6.93912e-05	0.000929251	3.00761e-08	7.08003e-05	0.024975	0.69113	-0.53297
EC:3.6.1.22	0.000254618	1.81629e-09	2.46055e-05	0.000175001	1.01273e-09	1.29919e-05	0.028971	0.687308	-0.540972
EC:1.1.1.60	0.000922875	1.62726e-09	2.32899e-05	0.000632849	3.06814e-08	7.15092e-05	0.04995	0.685737	-0.544273
EC:6.3.2.3	0.000505903	2.13747e-09	2.66925e-05	0.000346207	7.49677e-09	3.53477e-05	0.037962	0.684334	-0.547227
EC:1.14.14.9	0.000381775	9.02119e-10	1.73409e-05	0.000260516	2.37394e-09	1.98911e-05	0.018981	0.682381	-0.551351
EC:1.8.1.8	0.00107104	1.00969e-08	5.8014e-05	0.000729389	3.09928e-08	7.18712e-05	0.037962	0.681013	-0.554247
EC:2.1.2.11	0.000347293	7.27826e-09	4.92553e-05	0.000235683	2.17112e-09	1.90224e-05	0.041958	0.678629	-0.559305
EC:3.4.11.18	0.000410587	2.76488e-09	3.03583e-05	0.000277884	5.83596e-09	3.11875e-05	0.038961	0.676797	-0.563206
EC:2.6.99.2	0.000533708	2.444e-09	2.85424e-05	0.000359877	7.01534e-09	3.41939e-05	0.032967	0.674296	-0.568546
EC:1.3.1.34	0.000850499	2.70024e-09	3.00014e-05	0.000571457	1.78781e-08	5.45865e-05	0.018981	0.671909	-0.573663
EC:2.1.1.228	0.000477304	6.73585e-09	4.73844e-05	0.000318932	4.36593e-09	2.69751e-05	0.044955	0.668194	-0.58166
EC:2.7.2.3	0.000563371	5.00472e-09	4.08441e-05	0.000375559	7.79784e-09	3.60505e-05	0.031968	0.666629	-0.585045
EC:1.3.7.8	0.000590729	3.51072e-09	3.42088e-05	0.000393731	6.40577e-09	3.26746e-05	0.018981	0.666517	-0.585287
EC:3.6.3.30	0.000949447	1.73202e-08	7.59829e-05	0.000630277	1.9779e-08	5.74151e-05	0.030969	0.663836	-0.591101
EC:1.1.1.18	0.00124099	5.209e-09	4.16693e-05	0.000823039	2.98497e-08	7.05333e-05	0.018981	0.663213	-0.592455
EC:5.3.1.16	0.000491433	1.52899e-09	2.25758e-05	0.00032558	5.90032e-09	3.1359e-05	0.032967	0.662512	-0.593983
EC:2.6.1.11 2.6.1.17	0.00031764	1.61666e-09	2.3214e-05	0.000209424	2.54465e-09	2.05939e-05	0.030969	0.659311	-0.60097
EC:3.3.1.1	0.000836232	2.64581e-08	9.39116e-05	0.000548793	9.14005e-09	3.903e-05	0.026973	0.656268	-0.607642
EC:3.5.4.16	0.00040511	4.29393e-10	1.19637e-05	0.000265663	2.27198e-09	1.94593e-05	0.018981	0.65578	-0.608717
EC:1.17.1.2	0.000761511	2.30978e-08	8.77454e-05	0.000491382	6.0629e-09	3.17881e-05	0.018981	0.645272	-0.63202
EC:4.2.1.55	0.000878884	4.52361e-08	0.000122795	0.000564957	6.8727e-09	3.38445e-05	0.02997	0.642812	-0.63753
EC:4.99.1.1	0.000411416	7.54949e-09	5.01647e-05	0.000263349	5.25937e-09	2.96068e-05	0.038961	0.640104	-0.643622
EC:4.1.1.9	0.000402164	1.13644e-08	6.15479e-05	0.000255573	4.06722e-09	2.60359e-05	0.031968	0.635496	-0.654045
EC:1.6.99.5	0.00103609	1.50363e-08	7.07962e-05	0.000655576	1.04464e-08	4.17261e-05	0.018981	0.632741	-0.660314
EC:2.7.7.41	0.000280063	1.01816e-09	1.84225e-05	0.000176018	1.41269e-09	1.53443e-05	0.018981	0.628492	-0.670034
EC:6.4.1.4	0.00133308	3.01298e-10	1.00216e-05	0.000835259	3.45866e-08	7.59238e-05	0.018981	0.626564	-0.674466
EC:3.4.11.5	0.000956707	1.21498e-08	6.36391e-05	0.000598268	6.77514e-09	3.36034e-05	0.018981	0.62534	-0.677286
EC:2.7.1.26 2.7.7.2	0.000394232	2.02185e-08	8.20946e-05	0.000243764	6.76982e-09	3.35902e-05	0.038961	0.618326	-0.69356
EC:3.4.24.64	0.000386347	1.62308e-09	2.32599e-05	0.000238798	4.5758e-09	2.76158e-05	0.018981	0.61809	-0.69411
EC:4.1.1.45	0.00136361	2.88543e-08	9.8072e-05	0.000841884	5.83767e-09	3.11921e-05	0.018981	0.617393	-0.695739
EC:1.8.99.2	0.000233034	3.1998e-09	3.26589e-05	0.000143817	5.65821e-10	9.711e-06	0.018981	0.617149	-0.696309
EC:3.4.24.70	0.000573842	1.39627e-08	6.8222e-05	0.000353636	7.94056e-09	3.63789e-05	0.024975	0.61626	-0.698389
EC:4.1.1.37	0.000529395	3.01575e-08	0.000100262	0.000324646	6.39414e-09	3.26449e-05	0.02997	0.613239	-0.705478
EC:4.1.1.17	0.000308457	3.04194e-10	1.00696e-05	0.000188188	2.3623e-09	1.98423e-05	0.018981	0.610094	-0.712896
EC:4.2.1.32	0.000395037	5.14953e-09	4.14308e-05	0.000240594	3.12778e-09	2.28319e-05	0.018981	0.609041	-0.71539
EC:1.14.11.17	0.000619511	6.34484e-10	1.45429e-05	0.000376777	8.27829e-09	3.71445e-05	0.018981	0.608184	-0.71742
EC:1.2.1.70	0.000978165	1.21278e-09	2.01062e-05	0.000594327	7.43674e-09	3.52059e-05	0.018981	0.607595	-0.718819
EC:1.5.8.4	0.000271824	3.63473e-09	3.48077e-05	0.000164122	2.71233e-09	2.12616e-05	0.033966	0.60378	-0.727905
EC:1.1.1.94	0.00044714	4.51055e-10	1.22618e-05	0.000269003	1.97397e-09	1.81382e-05	0.018981	0.601608	-0.733103
EC:1.1.1.169	0.00101367	8.93371e-09	5.45702e-05	0.000609772	2.51917e-08	6.47967e-05	0.018981	0.601551	-0.733242
EC:1.1.1.125	0.000248209	4.69913e-09	3.95775e-05	0.000149047	1.79722e-09	1.73071e-05	0.026973	0.600489	-0.735791
EC:2.4.1.15	0.000541979	7.23595e-09	4.91119e-05	0.000324503	3.79087e-09	2.51359e-05	0.018981	0.598736	-0.740008
EC:3.1.1.22	0.000352818	9.89827e-09	5.74406e-05	0.000210495	3.25158e-09	2.32794e-05	0.018981	0.59661	-0.74514
EC:6.3.2.12 6.3.2.17	0.000991315	3.53116e-08	0.000108492	0.000589656	2.64083e-08	6.63429e-05	0.027972	0.594822	-0.74947
EC:2.3.2.8	0.000299583	3.47003e-10	1.07549e-05	0.000177454	4.10232e-09	2.6148e-05	0.042957	0.592336	-0.755513
EC:4.1.2.5	0.000572236	3.09964e-09	3.21436e-05	0.000338942	7.4473e-09	3.52309e-05	0.018981	0.592313	-0.755569
EC:3.6.1.11 3.6.1.40	0.00112773	4.20317e-08	0.000118366	0.000658632	2.55918e-08	6.53093e-05	0.018981	0.584035	-0.775873
EC:2.7.7.23 2.3.1.157	0.00058265	2.59186e-10	9.29492e-06	0.000339858	9.20437e-09	3.91671e-05	0.018981	0.583296	-0.7777
EC:1.1.1.272	0.000536669	1.24133e-08	6.43255e-05	0.000312552	6.76524e-09	3.35789e-05	0.026973	0.582393	-0.779934
EC:1.3.7.9	0.00082731	4.42991e-08	0.000121517	0.000480254	1.2469e-08	4.55869e-05	0.033966	0.5805	-0.784631
EC:3.5.1.16	0.000607404	5.98788e-09	4.46762e-05	0.000352417	1.69336e-09	1.67996e-05	0.018981	0.580202	-0.785373
EC:1.4.1.21	0.000375515	6.24134e-09	4.56119e-05	0.000213032	6.32322e-09	3.24634e-05	0.041958	0.567305	-0.817803
EC:4.4.1.11	0.000118652	5.6953e-10	1.37784e-05	6.71103e-05	7.77778e-10	1.13855e-05	0.044955	0.565607	-0.822128
EC:3.7.1.16 1.17.1.7	0.000200279	3.21374e-09	3.27299e-05	0.000113117	1.19736e-09	1.41265e-05	0.018981	0.564799	-0.82419
EC:4.2.1.79	0.000837848	4.49566e-08	0.000122415	0.000466476	6.44699e-09	3.27795e-05	0.018981	0.556755	-0.844885
EC:2.5.1.55	0.000354538	4.79369e-09	3.99737e-05	0.000196069	4.02041e-09	2.58857e-05	0.038961	0.553026	-0.854581
EC:1.8.98.1	0.00155904	6.42513e-09	4.62786e-05	0.000855254	3.56435e-08	7.70752e-05	0.018981	0.548576	-0.866236
EC:4.1.1.68	0.000320123	7.33147e-09	4.9435e-05	0.000174395	1.96691e-09	1.81058e-05	0.018981	0.544773	-0.876273
EC:2.3.3.15	0.000706166	4.69745e-10	1.25133e-05	0.000384446	1.47031e-08	4.95026e-05	0.018981	0.544413	-0.877226
EC:2.6.1.19	0.000338179	2.63494e-09	2.96364e-05	0.000183988	1.82158e-09	1.7424e-05	0.018981	0.544054	-0.878179
EC:3.5.1.68	0.000514239	1.58869e-08	7.27711e-05	0.000276605	5.56623e-09	3.04583e-05	0.018981	0.537893	-0.894609
EC:2.3.1.191	0.000303221	4.58864e-09	3.91094e-05	0.000162689	6.04101e-09	3.17307e-05	0.047952	0.536537	-0.89825
EC:6.3.5.7	0.000143025	1.40251e-09	2.16218e-05	7.59138e-05	1.08316e-09	1.3436e-05	0.047952	0.530773	-0.913832
EC:2.3.1.41	0.000902025	6.75793e-09	4.7462e-05	0.000474784	1.44924e-08	4.91467e-05	0.018981	0.526353	-0.925896
EC:2.9.1.1	0.000391334	3.37281e-08	0.000106032	0.000205256	4.86512e-09	2.84755e-05	0.043956	0.524503	-0.930978
EC:2.5.1.44	0.000299563	1.5194e-09	2.25048e-05	0.000152238	7.68576e-09	3.57905e-05	0.042957	0.5082	-0.976533
EC:2.7.7.60	0.000382587	1.73886e-08	7.61327e-05	0.000190402	4.82899e-09	2.83696e-05	0.024975	0.49767	-1.00674
EC:4.1.1.7	0.00040762	3.56988e-09	3.44958e-05	0.000199715	2.68177e-09	2.11415e-05	0.018981	0.489953	-1.02929
EC:4.2.1.107	0.00011772	4.05211e-10	1.1622e-05	5.7462e-05	6.22194e-10	1.01833e-05	0.02997	0.488126	-1.03467
EC:1.14.13.50	0.000139569	1.43105e-09	2.18407e-05	6.69802e-05	3.78396e-10	7.94141e-06	0.027972	0.479908	-1.05917
EC:1.14.16.1	0.000188976	6.02167e-09	4.48021e-05	8.99641e-05	1.04794e-09	1.32158e-05	0.024975	0.47606	-1.07078
EC:4.2.99.20	0.000346761	3.35833e-09	3.34581e-05	0.000164597	1.08072e-08	4.24406e-05	0.033966	0.474671	-1.075
EC:5.5.1.7	6.36607e-05	1.46094e-10	6.97838e-06	2.88349e-05	6.41203e-11	3.26905e-06	0.018981	0.452947	-1.14259
EC:4.2.1.19 3.1.3.15	0.000144709	4.34213e-09	3.80444e-05	6.40756e-05	3.52317e-10	7.66287e-06	0.025974	0.442789	-1.17531
EC:2.7.1.130	0.000372861	2.34976e-09	2.79867e-05	0.000164317	6.58325e-09	3.31241e-05	0.018981	0.440693	-1.18215
EC:1.2.99.7	8.4531e-05	5.15009e-11	4.1433e-06	3.69873e-05	2.80744e-10	6.84037e-06	0.018981	0.437559	-1.19245
EC:2.4.1.57	0.000126033	1.59114e-09	2.303e-05	5.39959e-05	3.94688e-10	8.11056e-06	0.018981	0.428427	-1.22288
EC:1.1.1.28	0.000250153	9.5362e-09	5.63803e-05	0.000102386	1.52574e-09	1.59465e-05	0.033966	0.409294	-1.28879
EC:4.1.1.70	8.12537e-05	6.05327e-10	1.42048e-05	3.31282e-05	4.64669e-10	8.80027e-06	0.032967	0.407713	-1.29437
EC:1.3.5.2	0.000109334	2.43529e-10	9.0098e-06	4.27527e-05	5.78559e-10	9.8197e-06	0.018981	0.391029	-1.35465
EC:3.1.2.20	0.000115663	4.02931e-09	3.66484e-05	4.38942e-05	1.40208e-10	4.83404e-06	0.026973	0.379501	-1.39782
EC:2.7.1.37	0.000187897	1.73049e-09	2.40173e-05	6.9939e-05	8.68293e-10	1.20298e-05	0.018981	0.37222	-1.42577
EC:2.1.1.95	0.000138873	5.73793e-10	1.38298e-05	5.10391e-05	1.12663e-09	1.3703e-05	0.018981	0.367522	-1.4441
EC:5.4.99.18	0.000337591	1.12894e-09	1.93988e-05	0.000122008	1.51978e-09	1.59153e-05	0.018981	0.361407	-1.4683
EC:1.1.1.154	0.000218323	6.32017e-10	1.45146e-05	7.75794e-05	1.72285e-09	1.69453e-05	0.018981	0.355342	-1.49272
EC:3.4.11.10	0.0001267	1.88914e-09	2.50941e-05	4.43777e-05	7.72428e-10	1.13463e-05	0.031968	0.350258	-1.51351
EC:2.1.1.107 4.2.1.75	0.000188268	6.56148e-09	4.67671e-05	6.51062e-05	1.17029e-09	1.3966e-05	0.026973	0.345816	-1.53192
EC:1.1.1.65	0.000297231	1.02897e-09	1.852e-05	9.48518e-05	7.2444e-10	1.09882e-05	0.018981	0.319118	-1.64784
EC:1.2.1.46	6.408e-05	3.21561e-10	1.03531e-05	2.00645e-05	5.45326e-10	9.5335e-06	0.032967	0.313116	-1.67523
EC:2.3.1.48	6.86571e-05	1.21977e-10	6.37643e-06	2.14104e-05	4.58172e-10	8.73853e-06	0.034965	0.311846	-1.68109
EC:3.3.2.1	9.99354e-05	3.53258e-10	1.08514e-05	3.08151e-05	6.10722e-10	1.0089e-05	0.018981	0.30835	-1.69736
EC:4.1.3.38	7.71979e-05	6.65776e-10	1.48972e-05	1.96047e-05	5.31748e-11	2.97699e-06	0.018981	0.253953	-1.97736
EC:4.1.3.6 2.8.3.10	3.94071e-05	9.53206e-11	5.6368e-06	9.31891e-06	5.86567e-11	3.12668e-06	0.018981	0.236478	-2.08022
EC:3.5.4.19	9.26621e-05	1.38206e-09	2.14636e-05	2.07615e-05	5.89887e-10	9.91537e-06	0.031968	0.224056	-2.15807
EC:4.2.1.41	5.14334e-05	1.06224e-10	5.95048e-06	1.1053e-05	3.18837e-10	7.28969e-06	0.018981	0.214899	-2.21827
EC:1.16.3.1	8.65379e-05	2.47571e-09	2.87269e-05	1.80541e-05	1.42767e-10	4.87795e-06	0.026973	0.208626	-2.26101
EC:1.1.1.61	0.000145911	8.49962e-09	5.32279e-05	2.66454e-05	1.04758e-09	1.32135e-05	0.025974	0.182614	-2.45313
EC:6.3.2.19	1.50618e-05	1.16297e-12	6.22621e-07	2.35135e-06	3.31731e-11	2.35135e-06	0.018981	0.156114	-2.67933
EC:3.1.4.50	2.45994e-05	2.23315e-10	8.62776e-06	3.38365e-06	6.86947e-11	3.38365e-06	0.038961	0.13755	-2.86197
EC:2.4.1.32	2.33945e-05	8.12936e-11	5.20556e-06	2.8902e-06	5.01197e-11	2.8902e-06	0.031968	0.123542	-3.01692
EC:1.10.9.1	7.38427e-05	1.71506e-09	2.391e-05	7.03123e-06	1.25396e-10	4.57159e-06	0.018981	0.095219	-3.39261
EC:3.4.24.25	2.40175e-05	5.03788e-11	4.09792e-06	1.5245e-06	1.39447e-11	1.5245e-06	0.018981	0.0634747	-3.97767
